1 **SARS-CoV-2 RNA in urban wastewater samples to monitor the COVID-19 epidemic in**  
2 **Lombardy, Italy (March – June 2020)**

3

4

5 Sara Castiglioni<sup>1\*</sup>, Silvia Schiarea<sup>1</sup>, Laura Pellegrinelli<sup>2</sup>, Valeria Primache<sup>2</sup>, Cristina Galli<sup>2</sup>, Laura Bubba<sup>2</sup>,  
6 Federica Mancinelli<sup>1</sup>, Marilisa Marinelli<sup>3</sup>, Danilo Cereda<sup>4</sup>, Emanuela Ammoni<sup>4</sup>, Elena Pariani<sup>2</sup>, Ettore  
7 Zuccato<sup>1</sup>, Sandro Binda<sup>2</sup>

8

9 <sup>1</sup> Istituto di Ricerche Farmacologiche Mario Negri IRCCS, Department of Environmental Sciences, Via  
10 Mario Negri 2, 20156 Milan, Italy

11 <sup>2</sup> Department of Biomedical Sciences of Health, University of Milan, Via Pascal 36, 20133 Milan, Italy

12 <sup>3</sup> ddPCR Field Applications Specialist, Bio-Rad Laboratories, Milan, Italy

13 <sup>4</sup> DG Welfare, Regione Lombardia, Milan, Italy

14

15

16 \*Corresponding Author:

17 Dr. Sara Castiglioni, PhD

18 Istituto di Ricerche Farmacologiche Mario Negri IRCCS

19 Via Mario Negri 2, 20156 Milano

20 e-mail: sara.castiglioni@marionegri.it

21

22

23

24

25

26

27

28 **Abstract**

29 Wastewater-based viral surveillance is a promising approach to monitor the circulation of SARS-CoV-2  
30 in the general population. The aim of this study was to develop an analytical method to detect SARS-  
31 CoV-2 RNA in urban wastewater, to be implemented in the framework of a surveillance network in  
32 the Lombardy region (Northern Italy). This area was the first hotspot of COVID-19 in Europe.  
33 Composite 24h samples were collected weekly in eight cities from end-March to mid-June 2020 (first  
34 peak of the epidemic). The method developed and optimized, involved virus concentration, using PEG  
35 centrifugation, and one-step real-time RT-PCR for analysis. SARS-CoV-2 RNA was identified in 65 (61%)  
36 out of 107 samples, and the viral concentrations (up to  $2.1 \times 10^5$  copies/L) were highest in March-  
37 April. By mid-June, wastewater samples tested negative in all the cities. Viral loads were used for  
38 inter- city comparison and Brembate, Ranica and Lodi had the highest. The pattern of decrease of  
39 SARS-CoV-2 in wastewater was closely comparable to the decline of active COVID-19 cases in the  
40 population, reflecting the effect of lock-down. Wastewater surveillance of SARS-CoV-2 can integrate  
41 ongoing virological surveillance of COVID-19, providing information from both symptomatic and  
42 asymptomatic individuals, and monitoring the effect of health interventions.

43 **Keywords:** SARS-CoV-2; urban wastewater; viral loads, environmental surveillance, active cases.

44

45

46

47

48        **1. Introduction**

49        The severe acute respiratory syndrome coronavirus-2 (SARS-CoV-2) is responsible for the Corona  
50 Virus Disease-19 (COVID-19), a highly infectious respiratory disease that has spread throughout the  
51 world at an unprecedented rate from Wuhan, China, since December 2019, affecting over 147 million  
52 people and causing more than 3,100,000 deaths so far (ECDC, COVID-19 situation update worldwide).  
53 On 11 March 2020, the World Health Organisation (WHO) declared a pandemic and most countries  
54 started practising social isolation and restrictions of commercial and industrial activities, which are  
55 partially still in place, with enormous socio-economic impact. Healthcare systems in all countries have  
56 been – and still are – facing big challenges to tackle the emergency and deal with the need for  
57 intensive care for large numbers of patients. In this framework, there is an urgent need for novel tools  
58 to monitor the epidemic trends timely and improve the sensitivity and representativeness of public  
59 health surveillance systems. Clinical data are currently the main source of information for infectious  
60 disease surveillance and tracking, but suffer reporting bias and inability to track asymptomatic carriers  
61 (Thompson et al., 2020).

62        Since the beginning of the pandemic, surveillance of untreated wastewater samples (also called  
63 wastewater-based epidemiology - WBE) has been regarded as a promising approach to monitor the  
64 circulation of SARS-CoV-2 in the general population (Bivins et al., 2020; Farkas et al., 2020; Lodder and  
65 de Roda Husman, 2020). So far, wastewater surveillance has been proposed as a powerful tool for  
66 monitoring several factors related to human health, such as the spread of infectious diseases (McCall  
67 et al., 2020; Sims and Kasprzyk-Hordern, 2020) and antibiotic resistance (Aarestrup and Woolhouse,  
68 2020; The Global Sewage Surveillance project consortium et al., 2019). Wastewater-based viral  
69 surveillance has been used with successful results for early warning of disease outbreaks, informing

70 the efficacy of public health interventions as part of the poliovirus eradication strategy (Lodder and de  
71 Roda Husman, 2020; Pellegrinelli et al., 2017), and tracking other enteric viruses such as non-polio  
72 enteroviruses, Hepatitis viruses and Rotavirus (Bisseux et al., 2020; Delogu et al., 2018; Fumian et al.,  
73 2019; Pellegrinelli et al., 2019). These studies have indicated a good epidemiological link between  
74 viral outbreaks and the amounts of viruses in untreated wastewater (sewage), suggesting that  
75 wastewater monitoring can complement clinical surveillance of severe diseases giving useful  
76 additional information.

77 It has been demonstrated that SARS-CoV-2 is excreted by faecal route in 30-50% of people who  
78 test positive (Parasa et al., 2020; Wang et al., 2020), and it lasts longer in stool than in the respiratory  
79 tract (nearly 28 days) (Y. Wu et al., 2020). This means it is likely to be found in sewage samples at the  
80 inlet of wastewater treatment plants (WWTPs), composed of the faecal material from an entire  
81 community. In fact, SARS-CoV-2 RNA was detected in early March 2020 in wastewater in the  
82 Netherlands (Medema et al., 2020), demonstrating for the first time the feasibility of the WBE  
83 approach to monitor the circulation of the virus in the population. Wastewater surveillance offers a  
84 real-time cost-effective tool for surveying both symptomatic and asymptomatic individuals in an  
85 entire community, complementing clinical data where testing is limited to patients with symptoms.  
86 Moreover, if applied as routine, it can give early warning of the (re)emergence of SARS-CoV-2 or other  
87 viruses in a population, as demonstrated by SARS-CoV-2 detection in wastewater before the first  
88 cases were notified to the healthcare systems (La Rosa et al., 2020; Medema et al., 2020).

89 Wastewater surveillance for SARS-CoV-2 has been applied in studies all over the world: The  
90 Netherlands (Medema et al., 2020), Italy (Baldovin et al., 2021; La Rosa et al., 2020; Rimoldi et al.,  
91 2020), Spain (Randazzo et al., 2020), Germany (Westhaus et al., 2021), Czech Republic (Mlejnkova et

92 al., 2020), the USA (Gonzalez et al., 2020; Peccia et al., 2020; Sherchan et al., 2020; F. Wu et al., 2020),  
93 Australia (Ahmed et al., 2020a), Japan (Haramoto et al., 2020; Hata et al., 2021), United Arab  
94 Emirates (Albastaki et al., 2021; Hasan et al., 2021). A global collaborative network was launched in  
95 early April 2020 (Bivins et al., 2020) to facilitate the combination of different expertise for undertaking  
96 WBE in the fight against COVID-19, through a common platform for data sharing  
97 (<http://www.covid19wbec.org/>) and the Centres for Disease Control and Prevention (CDC) recently  
98 published guidance for wastewater-based disease surveillance (CDC, a 2020). A number of countries  
99 are applying this approach at a national level as an additional monitoring tool alongside of clinical and  
100 epidemiological investigations.

101 Lombardy was the first hotspot in a country other than China and the outbreak of COVID-19 was  
102 one of the deadliest (ECDC, COVID-19 situation update worldwide) including the successive waves of  
103 the epidemic. An Italian surveillance strategy called “integrated virological surveillance of COVID-19”  
104 was established in response to the epidemic, for tracking infection by collecting respiratory samples  
105 mainly from symptomatic individuals (Istituto Superiore di Sanità - ISS). The present investigation  
106 aimed to complement this strategy by applying WBE to monitor spatial and temporal profiles of the  
107 epidemic by detecting SARS-CoV-2 RNA in urban wastewater collected in Lombardy (Northern Italy)  
108 from 31 March (first peak of the pandemic) to mid-June 2020 (end of the first wave). A simple and  
109 reliable analytical method was developed and implemented in the framework of a surveillance  
110 network in the Lombardy region. This method, based on virus concentration with PEG centrifugation  
111 and real-time PCR analysis, was optimized and employed for monitoring the spread of SARS-CoV-2 in  
112 the eight cities most affected by COVID-19 in Lombardy. To the best of our knowledge, this is one of

113 the most extensive WBE studies performed for monitoring the presence of SARS-CoV-2 in an area  
114 heavily affected by COVID-19.

115

116

## 117 **2. Material and methods**

### 118 **2.1 Wastewater Sampling**

119 Composite 24h raw wastewater samples were collected at the inlet of 8 Wastewater Treatment  
120 Plants (WWTPs) located in 1) Bergamo, 2) Brembate, 3) Ranica, 4) Brescia, 5) Cremona, 6) Crema, 7)  
121 Lodi, 8) Milan, in the Lombardy region, North of Italy (Figure 1). Sampling was designed to include the  
122 cities most affected by the first wave of COVID-19 in Lombardy, the first area severely hit by COVID-19  
123 in Europe. Figure 1 reports the municipalities investigated with the population served by each WWTP:  
124 overall, the combined WWTP catchments resulted in about 2,276,000 inhabitants. As the  
125 municipalities affected first and most by the epidemic in Italy, three WWTPs were investigated in the  
126 Bergamo province, namely Bergamo, Brembate and Ranica, the last one collecting wastewater from  
127 Alzano Lombardo and Nembro. Brescia was another nearby area rapidly involved in the epidemic and  
128 the main WWTP of the city was included in the study. Two WWTPs were investigated in Milan  
129 covering about 90% of the city population. Finally, three WWTPs in the south of the region were  
130 considered, i.e. Lodi, Crema and Cremona, because this was the place where SARS-CoV-2 was first  
131 detected and it was the first “red zone” in Italy (the municipality of Codogno).

132 Samples were collected once a week from the end of March 2020 to mid-June 2020 in all the  
133 sites. Sampling was done in volume or time proportional mode, depending on the automatic sampler  
134 available, and following protocols for WBE studies (Castiglioni et al., 2013). Samples were transferred

135 into polypropylene bottles, frozen at  $-20^{\circ}\text{C}$  and transported to the laboratory, where they were  
136 stored at the same temperature until analysis (within 4 months).

137

138

## 139 **2.2 Concentrations of SARS-CoV-2 from wastewater**

140 Samples were concentrated following the PEG/NaCl centrifugation method proposed by F. Wu  
141 et al., 2020, adapted as follows. Raw wastewater (45 mL) was transferred into a 50 mL sterile  
142 polypropylene Falcon tube and was left under UV light for 30 minutes to inactivate the infectivity of  
143 the virus. Two tubes per sample were processed (total volume 90 mL) and were kept under rotation  
144 during UV exposure. Thermic inactivation was also tested at different conditions, among which those  
145 suggested in the literature ( $60^{\circ}\text{C}$  for 30 minutes)(F. Wu et al., 2020), and gave comparable results to  
146 the UV light treatment. Samples were centrifuged for 30 min at  $4,500 \times g$  and  $4^{\circ}\text{C}$ , without brake, to  
147 remove particulate biomass (Centrifuge Eppendorf 5810 R). After centrifugation, 40 mL of  
148 supernatant were transferred into a fresh Falcon tube containing 4 g PEG 8000 and 0.9 g sodium  
149 chloride (Carlo Erba, Italy), and left in a shaker for 15 min at room temperature to dissolve the PEG.  
150 Samples were then centrifuged for 2h at  $12,000 \times g$  and  $4^{\circ}\text{C}$ , without brake. After centrifugation, the  
151 supernatant was discarded and the tubes were returned to the centrifuge at  $4^{\circ}\text{C}$  for a second step at  
152  $12,000 \times g$  for 5 min. The pellet in each tube was suspended in 750  $\mu\text{L}$  of tryzol (Life Technologies,  
153 Italy); the two aliquots per sample were merged and stored at  $-20^{\circ}\text{C}$  until RNA extraction.

154

## 155 **2.3 RNA extraction and SARS-CoV-2 molecular detection**

156           Viral RNA was extracted from sewage concentrates using the commercial kit QIAamp MinElute  
157 Virus Spin Kit (Qiagen, Germany) according to the manufacturer's instructions for large samples.  
158 Briefly, a wastewater sample concentrate (volume optimized 400  $\mu$ L) was added to 450  $\mu$ L of lysis  
159 mixture containing Buffer AL, carrier RNA and proteinase K. The lysate was added to 500  $\mu$ L of ethanol  
160 (96-100%) and nucleic acids were bound to the silica membrane of the QIAamp MinElute column by  
161 centrifugation. After three washing steps, nucleic acids were eluted in buffer AVE. Extraction was  
162 done using the automatic extractor QIAcube (Qiagen, Germany).

163           SARS-CoV-2 RNA was detected by a one-step real-time RT-PCR assay, amplifying different  
164 portions of the nucleocapsid (N) gene, namely N1 and N3, in accordance with the CDC protocol (CDC,  
165 b 2020). Specific positive (EURM-019) and negative (DNAse/RNAse-free distilled water) controls  
166 (three to six) were tested in all real-time RT-PCR runs.

167           To semi-quantify the SARS-CoV-2 viral load, a standard curve was plotted using 10-fold serial  
168 dilutions of the positive control material (EURM-019) provided by the European Commission. A  
169 sample was considered positive for SARS-CoV-2 when N1 or N3 or both viral targets showed a Cycle  
170 threshold (Ct) <39. Real-time RT-PCR runs were done with the QuantStudio 5 Real-time RT-PCR  
171 system (ThermoFisher Scientific, USA).

172           To assess the sensitivity of the different SARS-CoV-2 extraction protocols, results from a  
173 droplet digital PCR (ddPCR) was appraise. Concentrated wastewater samples were prepared using a  
174 droplet generator QX200 AutoDG (Bio-Rad, California, USA) and analysed with a QX200 ddPCR and  
175 droplet reader (Bio-Rad, California, USA). The 2019-nCoV CDC ddPCR Triplex Probe Assay was used to  
176 quantify the viral genome by targeting two regions of the N gene (N1 and N2). The PCR protocol was  
177 the one suggested by Bio-Rad (Bio-Rad SARS-CoV-2 ddPCR Kit) and the sample volume loaded for each



178 PCR reaction was 5.5  $\mu$ L. Samples were analysed in triplicate and controls (three to six) were run  
179 within each batch using RNA-free water.

180 To minimize potential Real-time RT-PCR contamination, RNA extraction, molecular assays set-  
181 up and real-time RT-PCR runs were all done in separate laboratories.

182

## 183 **2.4 Optimization of viral concentration and RNA extraction**

184 Different protocols for viral RNA concentration were tested to choose the most efficient for  
185 concentration from wastewater samples. A wastewater sample positive to SARS-CoV-2 in a  
186 preliminary investigation was treated using three different procedures: i) the two-phase  
187 (PEG/dextran) method from the 2003 WHO Guidelines for Environmental Surveillance of Poliovirus  
188 protocol, modified for enveloped viruses (La Rosa et al., 2020); ii) the PEG/NaCl centrifugation  
189 method (centrifuge speed 12000 x g) modified from F. Wu et al., 2020; iii) the PEG/NaCl  
190 centrifugation method modified using PEG 6000 and PEG 8000 at a lower centrifugation speed (3890  
191 x g). Details of each protocol are reported in the Supplementary Material (SM).

192 Viral RNA extraction was optimized by testing different volumes of concentrate: i) 200  $\mu$ L and  
193 ii) 400  $\mu$ L and different elution volumes: i) 100  $\mu$ L, ii) two consecutive 50  $\mu$ L elutions (as suggested by  
194 the manufacturer) for a total of 100  $\mu$ L, and iii) 60  $\mu$ L. To increase the sensitivity of analysis and have  
195 quantitative results, the droplet digital PCR (ddPCR) was used for these optimization tests.

196

## 197 **2.5 Quality control of the optimized protocol**

198 Once an optimal method of sewage concentration and extraction procedure was set, a quality  
199 control experiment was run to check the recovery rate of SARS-CoV-2 RNA and determine the

200 presence of real-time RT-PCR inhibition. A supernatant of cell culture infected by SARS-CoV-2 with a  
201 viral load of  $2.66E+12$ , was diluted 1:1000 to obtain a viral load of  $2.66E+9$  and added to a sample of  
202 wastewater, followed by a pasteurization procedure to inactivate the replication of the virus ( $56^\circ$  for 1  
203 h). After concentration, the spiked wastewater sample was analyzed in triplicate to quantify SARS-  
204 CoV-2 RNA recovery molecularly.

205

## 206 **2.6 Data analysis**

207 SARS-CoV-2 RNA concentrations, obtained as copies of RNA out of 1 liter of wastewater, were  
208 multiplied by the daily flow rate of each WWTP ( $m^3/day$ ) to obtain the viral loads entering the WWTPs  
209 daily from the population served. Loads were then normalized to the population to compare results  
210 from the different communities. The residential population was available for almost all the WWTPs  
211 and was used for normalization, in other cases the population equivalents estimated using  
212 hydrochemical parameters (i.e. biological oxygen demand - BOD) were used following a best practice  
213 protocol for data normalization (Castiglioni et al., 2013).

214 Viral loads were then compared to the number of “COVID-19 Active cases” at the date of  
215 sampling, estimated by summing the new cases diagnosed daily in the previous four weeks. The daily  
216 numbers of new cases in the different municipalities were obtained from The Economist (GitHub) and  
217 from the Regione Lombardia database (Regione Lombardia, 2020). A four week period was used  
218 considering the extended fecal excretion of SARS-CoV-2 up to 28 days after diagnosis, reported in the  
219 literature (Y. Wu et al., 2020).

220

## 221 **3. Results and Discussion**

222

### 223 **3.1 Protocol optimization**

224 The wastewater samples analysed using PEG/dextran procedure (i) were negative, while those  
225 analysed with the PEG/NaCl centrifugation methods (ii and iii) gave positive results, with the best  
226 performance using PEG 8000 and centrifuge at 12000xg (Table S1). This best protocol was also tested  
227 by adding the particulate collected from the first centrifuge to the water concentrate before RNA  
228 extraction (see SM for details), and performance improved (Table S1), though further investigation is  
229 needed to confirm this result.

230 The best volume for viral RNA extraction was 400  $\mu$ L (Table S2), and ddPCR clearly showed a  
231 double number of gene copies/mL when using 400  $\mu$ L instead of 200  $\mu$ L (Table S2). Considering the  
232 elution volume, the best result was obtained with 60  $\mu$ L (Table S3). The limit of detection (LOD) of the  
233 amplification assay with the optimized concentration and extraction methods was 1 copy/ $\mu$ L.

234

### 235 **3.2 Quality control of the extraction procedure**

236 After sample concentration, the viral load of SARS-CoV-2 in spiked wastewater was 2.5E+9 (Ct  
237 20.1) with a variability of replicates (relative standard deviation - RSD) of 0.4% (Table 1). The  
238 repeatability of the optimized extraction procedure for triplicate analysis of a real (not spiked)  
239 wastewater sample was good, with a RSD of 1%. The amount of SARS-CoV-2 recovered was fully  
240 comparable with the amount spiked in the wastewater samples (viral load 2.66E+9).

241 These results confirmed the efficiency of viral recovery from the optimized procedure and the  
242 absence of real-time RT-PCR inhibitors.

243

### 244 **3.3 Detection of SARS-CoV-2 RNA in wastewater samples**

245 At the end of February 2020, Italy reported the first two clusters of autochthonous SARS-CoV-2  
246 infection, identified in the provinces of Lodi and Bergamo (Codogno and Alzano Lombardo  
247 municipalities, respectively) in Lombardy. This region was the most affected with 94,000 COVID-19  
248 cases and over 16,500 related deaths up to June 2020 (Regione Lombardia, Dashboard COVID-19).  
249 The national lock-down with schools, offices, restaurants, bars and shops closed excluded those for  
250 primary needs such as food and medical supplies, and with people at home, was obligatory from mid-  
251 March 2020. The present study was conducted from the end of March to mid-June 2020, in the midst  
252 of the first Italian wave of COVID-19, starting two weeks after the national lock-down. Wastewater  
253 samples were collected at the inlet of 8 WWTPs in the Lombardy region and were frozen at  $-20^{\circ}\text{C}$   
254 after collection; this procedure did not affect the SARS-CoV-2 concentration since freezing  
255 temperatures can be used for storage when immediate SARS-CoV-2 RNA analysis from the  
256 wastewater influent is not possible (Hokajärvi et al., 2021).

257 SARS-CoV-2 RNA was identified in 65 out of 107 (61%) wastewater samples collected in  
258 Lombardy (Figure 1). The rate of positive samples was highest in the Bergamo area (78.7%; 26/33),  
259 with 83.3% (7/11) of positive samples in Brembate, 75% (9/12) in Ranica, and 63.6% (7/11) in  
260 Bergamo. A similar rate of positive samples was found in the close area of Brescia (77.8%; 7/9).  
261 Positive samples were slightly lower in the other areas, where respectively, 66.7% (8/12) and 61.5%  
262 (16/26) of sewage samples from WWTPs in Lodi and Milan tested positive for SARS-CoV-2, and 58.3%  
263 (7/12) in Cremona and Crema. As reported in Tables 2-4, the temporal trends of SARS-CoV-2  
264 circulation across Lombardy were similar; SARS-CoV-2 was highest in March-April 2020, followed by a

265 steep decline, with samples starting to give negative results for SARS-CoV-2 at the end of May, as  
266 observed in the Veneto region, close to Lombardy (Baldovin et al., 2021).

267 Overall, the highest SARS-CoV-2 concentrations were in the samples collected in late March  
268 and early April. From the province of Bergamo, the highest SARS-CoV-2 concentration was in  
269 Brembate ( $2.10 \times 10^5$  copies/L), followed by Ranica ( $2.28 \times 10^4$  copies/L) and Bergamo ( $1.02 \times 10^4$   
270 copies/L) at the end of March (Table 2). The SARS-CoV-2 genome was identified until mid-May in  
271 Bergamo and Ranica and until mid-June in Brembate. In the Brescia WWTP, the concentration of  
272 SARS-CoV-2 was highest at the end of March ( $6.28 \times 10^4$  copies/L) and the virus was detected until early  
273 May 2020 (Table 2). In the south of Lombardy, Lodi was the most affected province, where the virus  
274 was detected until mid-May with the highest concentration of SARS-CoV-2 for N1 assay at the end of  
275 March ( $7.64 \times 10^4$  copies/L) (Table 3). In Cremona and Crema, SARS-CoV-2 circulated until early May  
276 with the highest concentrations in early April ( $8.16 \times 10^3$  copies/L and  $6.96 \times 10^3$  copies/L,  
277 respectively) (Table 3).

278 The first evidence of the presence of SARS-CoV-2 in wastewater samples from Milan was  
279 reported in December 2019 (La Rosa et al., 2021), and wastewater was also positive in February 2020,  
280 on investigating the gene ORF1ab (La Rosa et al., 2020). In our study, two WWTPs in Milan were  
281 investigated; in the first (WWTP1), sewage was monitored from the beginning of March until mid-  
282 June 2020, with a peak of SARS-CoV-2 ( $1.47 \times 10^4$  copies/L) on 26 March, followed by a decline (Table  
283 4). The second WWTP (WWTP 2) showed a progressive decline of SARS-CoV-2 concentrations until  
284 mid-May when it became undetectable (Table 4). In mid-June, SARS-CoV-2 was not detectable in any  
285 of the wastewater samples in Lombardy.

286 To the best of our knowledge, the present study reports the largest number of positive  
287 wastewater samples (61%) ever found in wastewater monitoring studies. This well reflects the  
288 incidence of SARS-CoV-2 infections in the area investigated, which was probably the most affected  
289 worldwide in March-April 2020. Samples from the Netherlands and in Massachusetts in March 2020,  
290 tested using the same N gene targets, gave SARS-CoV-2 RNA levels up to 2.2 E+03 copies/mL  
291 (Medema et al., 2020), and to 3 E+02 copies/mL (F. Wu et al., 2020), respectively. Randazzo et al.,  
292 2020 reported results from six cities in the region of Murcia, Spain, with a lower circulation of SARS-  
293 CoV-2 and a lower incidence of COVID-19. Ten cities were also investigated in Germany in April 2020  
294 and had lower concentrations of SARS-CoV-2 (2-20 copies/mL) than Italy, but they used a PCR assay  
295 targeting two different genes, M and RdRP (Westhaus et al., 2021). In the Czech Republic, 33 WWTPs  
296 were investigated in April-June 2020, but only 27% of WWTPs tested positive to SARS-CoV-2  
297 (Mlejnkova et al., 2020).

298 Other studies investigated temporal trends of SARS-CoV-2 in wastewater, in February-March  
299 and May-June, in Brisbane (Australia) (Ahmed et al., 2021), and in Southern Nevada (USA) (Gerrity et  
300 al., 2021) testing N1, N2 and E genes. Further monitoring has been done in Japan (Haramoto et al.,  
301 2020; Hata et al., 2021), in the United Arab Emirates (Albastaki et al., 2021; Hasan et al., 2021) and in  
302 the USA, in Louisiana (Sherchan et al., 2020) and Southeastern Virginia (Gonzalez et al., 2020).  
303 Generally in these studies, fewer wastewater samples tested positive for SARS-CoV-2 and  
304 concentrations were lower than those observed in Lombardy in the present study.

305  
306 **3.4 Quantification of SARS-CoV-2 RNA in wastewater samples**

307 To compare the loads of SARS-CoV-2 among the populations in this study, the viral copies/L  
308 detected in wastewater samples were multiplied by the flow rate of each WWTP ( $\text{m}^3/\text{day}$ ) and the  
309 obtained loads (copies/day) were normalized to the number of inhabitants served by each WWTP  
310 (Table 5). The N-gene, of which we amplified two portions (N1 and N3 assays), yields similar  
311 quantitative results, although there were more positive samples with the N1 fragment, as in previous  
312 studies (Medema et al., 2020; Randazzo et al., 2020; F. Wu et al., 2020).

313 In the period end of March - early April 2020, the overall viral load of SARS-CoV-2 that  
314 reflected the largest numbers of symptomatic, asymptomatic and paucisymptomatic individuals  
315 shedding the virus ranged from  $9.3 \text{ E}+10$  copies/day/1,000 people to  $8.2\text{E}+8$  copies/day/1,000 people  
316 (Table 5). The load of SARS-CoV-2 RNA copies/day/1,000 people was highest in Brembate ( $9.28+10$ ),  
317 Lodi ( $1.97\text{E}+10$ ), Ranica ( $1.25\text{E}+10$ ), Brescia ( $1.24\text{E}+10$ ) and Bergamo ( $3.4\text{E}+09$ ) in the first week of the  
318 study. This is in agreement with the COVID-19 hotspots in March 2020 that were seen exactly in these  
319 areas (Bergamo, Brescia and Lodi provinces) as described above. In May, the viral load decreased in all  
320 the areas, though low levels persisted until the beginning of June in some cities (Brembate, Ranica,  
321 Brescia and Crema). Viral loads were also used in a recent study in Germany, in the Frankfurt  
322 metropolitan area, to assess temporal trends of SARS-CoV-2 from April to August 2020 (Agrawal et al.,  
323 2021).

324

### 325 **3.5 Correlation of SARS-CoV-2 RNA detection in wastewater samples and in respiratory** 326 **samples (active cases)**

327 SARS-CoV-2 RNA levels in wastewater were compared to other epidemiological indicators,  
328 such as the number of COVID-19 infections recorded in the corresponding area (Regione Lombardia,

329 2020). Clearly, virus level in wastewater should not be compared with the number of “new” cases, but  
330 with the “total” number of active cases in the population. Total active infections were calculated in all  
331 the municipalities served by each WWTP by considering as “active” those diagnosed in the past 4  
332 weeks before the date of sampling, as described above.

333 Figure 2 and 3 report the correlation among RNA viral loads of SARS-CoV-2 in wastewater and  
334 COVID-19 total active cases in the population in the same areas. In general, similar trends were  
335 observed, with a pattern of decrease of SARS-CoV-2 in wastewater samples comparable to the decline  
336 of the active cases in the population. This very likely reflected the effect of the lock-down at the  
337 beginning of March in Lombardy. However, in some cities the trend of the curve of the virus in  
338 wastewater seems to anticipate the curve of the number of active cases, pointing to a possible  
339 predictive capacity of this indicator for the development of the pandemic, as suggested in other  
340 studies (Agrawal et al., 2021; Saguti et al., 2021; Trottier et al., 2020). For instance, in Ranica (Figure 2)  
341 an increase of SARS-CoV-2 in wastewater samples was observed in mid-April and early May, followed  
342 by an increase of active cases two weeks later.

343

### 344 **3.6 Gaps and future perspectives**

345 Several studies, including the present, have demonstrated that monitoring SARS-CoV-2 RNA in  
346 wastewater can depict the epidemic curve of COVID-19. Analytical methods set up have been  
347 performed promptly, and several useful applications are now available in the literature. Nevertheless,  
348 further research is still needed to close some knowledge gaps, related especially to the comparability  
349 of the protocols for monitoring SARS-CoV-2 in wastewater, the quality controls and data  
350 interpretation.



351 Several different analytical protocols have been adopted so far (Ahmed et al., 2020c), and they  
352 need to be optimized and standardized (Kitajima et al., 2020; Michael-Kordatou et al., 2020) using  
353 common quality control procedures. Different external controls, including human coronavirus  
354 surrogates, have been tested so far, giving a wide range of recoveries (Alygizakis et al., 2021). The  
355 European Commission recently released a first recommendation for a common approach to establish  
356 systematic surveillance of SARS-CoV-2 in wastewater (EU, 2021 a), which is the result of a common  
357 joint action to share information (European Commission, 2021 b).

358 In terms of interpreting data, we proposed here the calculation of viral loads and  
359 normalization to the population investigated to facilitate comparison between studies. Results from  
360 wastewater should also be related to the existing epidemiological indicators. This was an explorative  
361 study, and wastewater data were correlated only with the total number of active cases. However, it  
362 would be interesting to work out correlations with other epidemiological indicators, such as  
363 hospitalization, intensive care demand and death, using also finer statistical tools. This could help  
364 make better use of the results from wastewater and valorize the ability of WBE to track infections  
365 from symptomatic and asymptomatic individuals in an entire community.

366 Another possibility lies in estimating prevalence of the infection from the total number of  
367 SARS-CoV-2 RNA copies in wastewater by considering the number of viral copies shed in stool by  
368 infected individuals (Ahmed et al., 2020a). This estimation was attempted by F. Wu et al., 2020, and  
369 indicated a much larger number of infections than the clinical cases recorded. Nevertheless, the  
370 uncertainty related to this procedure may be very high due to the wide variability of the load of viral  
371 material shed in faeces by asymptomatic, pre-symptomatic and symptomatic cases, the duration of  
372 excretion, and limited knowledge of the fate of viral particles in sewer systems. To the best of our

373 knowledge, only one study has investigated SARS-CoV-2 decay in wastewater under different  
374 conditions that may simulate the sewer network (Ahmed et al., 2020b). Further information is  
375 therefore required to reduce the biases currently associated to relate viral loads to the numbers of  
376 cases.

377 Wastewater monitoring for SARS-CoV-2 may cast light on the real number of cases in a  
378 population which – especially during the first phase of the epidemic – was underestimated. In fact,  
379 population monitoring through swabbing mainly involved symptomatic individuals, and therefore  
380 covered only part of the total individuals infected. Some preliminary data on SARS-CoV-2 in  
381 wastewater seems to confirm the initial underestimation of COVID-19 cases in the population. Future  
382 research will have to enlarge the case studies and quantitatively assess this phenomenon in  
383 Lombardy.

384 A further application of this surveillance tool that call for more investigation is the identification of  
385 virus variants in wastewater and the estimation of their incidence in the population with a single  
386 measurement that gives information for an entire community.

387

#### 388 **4. Conclusions**

389 Monitoring SARS-CoV-2 in wastewater may serve as a new surveillance tool to describe the trend  
390 of the COVID-19 epidemic in the population. It should be seen as complementary to other  
391 epidemiological indicators, but offers the unique capacity to reflect, with a single measurement, the  
392 state of the pandemic in a population, and predict the spread of the infection. This indicator can  
393 integrate data from the ongoing virological surveillance of COVID-19, providing reliable estimates of  
394 the SARS-CoV-2 spread including both symptomatic and asymptomatic individuals, burdening the

395 population-level prevalence of COVID-19 disease, and the real dimension and trends of the epidemic  
396 in a population. Therefore, it can be helpful to monitor the effect of public health intervention, such  
397 as lock-down on the development of the pandemic.

398 The surveillance of wastewater samples will also serve as a valuable early warning of the  
399 circulation and re-emergence of SARS-CoV-2 infections in the coming months, including the  
400 identification of variants. This study will help in establishing a wide surveillance network to follow  
401 spatial and temporal profiles of the outbreak.

402

403

404

405

#### 406 **Acknowledgements**

407 The authors are grateful to WWTP personnel for sample collection and technical support with  
408 information for data analysis. In particular we acknowledge the valid assistance of Uniacque S.p.A,  
409 Società SAL srl, A2A Ciclo Idrico S.p.A., Metropolitana Milanese S.p.A., Padania Acque S.p.A.

410

#### 411 **References**

- 412 Aarestrup, F.M., Woolhouse, M.E.J., 2020. Using sewage for surveillance of antimicrobial resistance. *Science*  
413 367, 630–632. <https://doi.org/10.1126/science.aba3432>
- 414 Agrawal, S., Orschler, L., Lackner, S., 2021. Long-term monitoring of SARS-CoV-2 RNA in wastewater of the  
415 Frankfurt metropolitan area in Southern Germany. *Scientific Reports* 11.  
416 <https://doi.org/10.1038/s41598-021-84914-2>
- 417 Ahmed, W., Angel, N., Edson, J., Bibby, K., Bivins, A., O'Brien, J.W., Choi, P.M., Kitajima, M., Simpson, S.L., Li, J.,  
418 Tschärke, B., Verhagen, R., Smith, W.J.M., Zaugg, J., Dierens, L., Hugenholtz, P., Thomas, K.V., Mueller,  
419 J.F., 2020a. First confirmed detection of SARS-CoV-2 in untreated wastewater in Australia: A proof of  
420 concept for the wastewater surveillance of COVID-19 in the community. *Science of The Total*  
421 *Environment* 728, 138764. <https://doi.org/10.1016/j.scitotenv.2020.138764>

- 422 Ahmed, W., Bertsch, P.M., Bibby, K., Haramoto, E., Hewitt, J., Huygens, F., Gyawali, P., Korajkic, A., Riddell, S.,  
423 Sherchan, S.P., Simpson, S.L., Sirikanchana, K., Symonds, E.M., Verhagen, R., Vasan, S.S., Kitajima, M.,  
424 Bivins, A., 2020b. Decay of SARS-CoV-2 and surrogate murine hepatitis virus RNA in untreated  
425 wastewater to inform application in wastewater-based epidemiology. *Environmental Research* 191,  
426 110092. <https://doi.org/10.1016/j.envres.2020.110092>
- 427 Ahmed, W., Bivins, A., Bertsch, P.M., Bibby, K., Choi, P.M., Farkas, K., Gyawali, P., Hamilton, K.A., Haramoto, E.,  
428 Kitajima, M., Simpson, S.L., Tandukar, S., Thomas, K.V., Mueller, J.F., 2020c. Surveillance of SARS-CoV-2  
429 RNA in wastewater: Methods optimization and quality control are crucial for generating reliable public  
430 health information. *Current Opinion in Environmental Science & Health* 17, 82–93.  
431 <https://doi.org/10.1016/j.coesh.2020.09.003>
- 432 Ahmed, W., Tschärke, B., Bertsch, P.M., Bibby, K., Bivins, A., Choi, P., Clarke, L., Dwyer, J., Edson, J., Nguyen,  
433 T.M.H., O'Brien, J.W., Simpson, S.L., Sherman, P., Thomas, K.V., Verhagen, R., Zaugg, J., Mueller, J.F.,  
434 2021. SARS-CoV-2 RNA monitoring in wastewater as a potential early warning system for COVID-19  
435 transmission in the community: A temporal case study. *Science of The Total Environment* 761, 144216.  
436 <https://doi.org/10.1016/j.scitotenv.2020.144216>
- 437 Albastaki, A., Naji, M., Lootah, R., Almeheiri, R., Almula, H., Almarri, I., Alreyami, A., Aden, A., Alghafri, R., 2021.  
438 First confirmed detection of SARS-COV-2 in untreated municipal and aircraft wastewater in Dubai, UAE:  
439 The use of wastewater based epidemiology as an early warning tool to monitor the prevalence of  
440 COVID-19. *Science of The Total Environment* 760, 143350.  
441 <https://doi.org/10.1016/j.scitotenv.2020.143350>
- 442 Alygizakis, N., Markou, A.N., Rousis, N.I., Galani, A., Avgeris, M., Adamopoulos, P.G., Scorilas, A., Lianidou, E.S.,  
443 Paraskevis, D., Tsiodras, S., Tsakris, A., Dimopoulos, M.-A., Thomaidis, N.S., 2021. Analytical  
444 methodologies for the detection of SARS-CoV-2 in wastewater: Protocols and future perspectives. *TrAC*  
445 *Trends in Analytical Chemistry* 134, 116125. <https://doi.org/10.1016/j.trac.2020.116125>
- 446 Baldovin, T., Amoroso, I., Fonzo, M., Buja, A., Baldo, V., Cocchio, S., Bertonecello, C., 2021. SARS-CoV-2 RNA  
447 detection and persistence in wastewater samples: An experimental network for COVID-19  
448 environmental surveillance in Padua, Veneto Region (NE Italy). *Science of The Total Environment* 760,  
449 143329. <https://doi.org/10.1016/j.scitotenv.2020.143329>
- 450 Bio-Rad SARS-CoV-2 ddPCR Kit. Instruction for Use. Available at: [https://www.bio-](https://www.bio-rad.com/webroot/web/pdf/lsr/literature/10000128901.pdf)  
451 [rad.com/webroot/web/pdf/lsr/literature/10000128901.pdf](https://www.bio-rad.com/webroot/web/pdf/lsr/literature/10000128901.pdf). Last Access: 30 April 2021.
- 452 Bisseux, M., Debroas, D., Mirand, A., Archimbaud, C., Peigue-Lafeuille, H., Bailly, J.-L., Henquell, C., 2020.  
453 Monitoring of enterovirus diversity in wastewater by ultra-deep sequencing: An effective  
454 complementary tool for clinical enterovirus surveillance. *Water Research* 169, 115246.  
455 <https://doi.org/10.1016/j.watres.2019.115246>
- 456 Bivins, A., North, D., Ahmad, A., Ahmed, W., Alm, E., Been, F., Bhattacharya, P., Bijlsma, L., Boehm, A.B., Brown,  
457 J., Buttiglieri, G., Calabro, V., Carducci, A., Castiglioni, S., Cetecioglu Gurol, Z., Chakraborty, S., Costa, F.,  
458 Curcio, S., de los Reyes, F.L., Delgado Vela, J., Farkas, K., Fernandez-Casi, X., Gerba, C., Gerrity, D.,  
459 Girones, R., Gonzalez, R., Haramoto, E., Harris, A., Holden, P.A., Islam, M.T., Jones, D.L., Kasprzyk-  
460 Hordern, B., Kitajima, M., Kotlarz, N., Kumar, M., Kuroda, K., La Rosa, G., Malpei, F., Mautus, M.,  
461 McLellan, S.L., Medema, G., Meschke, J.S., Mueller, J., Newton, R.J., Nilsson, D., Noble, R.T., van Nuijs,  
462 A., Peccia, J., Perkins, T.A., Pickering, A.J., Rose, J., Sanchez, G., Smith, A., Stadler, L., Stauber, C.,  
463 Thomas, K., van der Voorn, T., Wigginton, K., Zhu, K., Bibby, K., 2020. Wastewater-Based Epidemiology:  
464 Global Collaborative to Maximize Contributions in the Fight Against COVID-19. *Environmental Science*  
465 *& Technology*. <https://doi.org/10.1021/acs.est.0c02388>
- 466 Castiglioni, S., Bijlsma, L., Covaci, A., Emke, E., Hernandez, F., Reid, M., Ort, C., Thomas, K.V., van Nuijs, A.L., de  
467 Voogt, P., Zuccato, E., 2013. Evaluation of uncertainties associated with the determination of  
468 community drug use through the measurement of sewage drug biomarkers. *Environ Sci Technol* 47,  
469 1452–60. <https://doi.org/10.1021/es302722f>

- 470 Centres for Disease Control and Prevention (CDC)a, Developing a Wastewater Surveillance Sampling Strategy.  
471 Available at: [https://www.cdc.gov/coronavirus/2019-ncov/cases-updates/wastewater-](https://www.cdc.gov/coronavirus/2019-ncov/cases-updates/wastewater-surveillance.html)  
472 [surveillance.html](https://www.cdc.gov/coronavirus/2019-ncov/cases-updates/wastewater-surveillance.html) Last Access: 30 April 2021.
- 473 Centres for Disease Control and Prevention (CDC)b, Research Use Only 2019-Novel Coronavirus (2019-nCoV)  
474 Real-time RT-PCR Primers and Probes. Available at: [https://www.cdc.gov/coronavirus/2019-](https://www.cdc.gov/coronavirus/2019-ncov/lab/rt-pcr-panel-primer-probes.html)  
475 [ncov/lab/rt-pcr-panel-primer-probes.html](https://www.cdc.gov/coronavirus/2019-ncov/lab/rt-pcr-panel-primer-probes.html). Last Access: 30 April 2021.
- 476 Delogu, R., Battistone, A., Buttinelli, G., Fiore, S., Fontana, S., Amato, C., Cristiano, K., Gamper, S., Simeoni, J.,  
477 Frate, R., Pellegrinelli, L., Binda, S., Veronesi, L., Zoni, R., Castiglia, P., Cossu, A., Triassi, M., Pennino, F.,  
478 Germinario, C., Balena, V., Cicala, A., Mercurio, P., Fiore, L., Pini, C., Stefanelli, P., 2018. Poliovirus and  
479 Other Enteroviruses from Environmental Surveillance in Italy, 2009–2015. *Food and Environmental*  
480 *Virology* 10, 333–342. <https://doi.org/10.1007/s12560-018-9350-8>
- 481 European Centre for Disease Prevention and Control (ECDC), COVID-19 situation update worldwide. Available  
482 at: <https://www.ecdc.europa.eu/en/cases-2019-ncov-eueea>. Last Access: 30 April 2021
- 483 European Commission (EU) 2021 a. Commission recommendation of 17.03.21 on a common approach to  
484 establish a systematic surveillance of SARS-CoV-2 and its variants in wastewaters in the EU. Available  
485 at: [https://ec.europa.eu/environment/pdf/water/recommendation\\_covid19\\_monitoring\\_wastewaters.](https://ec.europa.eu/environment/pdf/water/recommendation_covid19_monitoring_wastewaters.pdf)  
486 [pdf](https://ec.europa.eu/environment/pdf/water/recommendation_covid19_monitoring_wastewaters.pdf) Last Access: 30 April 2021
- 487 European Commission (EU) 2021 b. SARS-CoV-2 Surveillance employing Sewers EU Umbrella Study – Status  
488 Update. Available at: [https://ec.europa.eu/jrc/en/science-update/sars-cov-2-surveillance-employing-](https://ec.europa.eu/jrc/en/science-update/sars-cov-2-surveillance-employing-sewers-eu-umbrella-study-status-update)  
489 [sewers-eu-umbrella-study-status-update](https://ec.europa.eu/jrc/en/science-update/sars-cov-2-surveillance-employing-sewers-eu-umbrella-study-status-update). Last Access: 30 April 2021
- 490 Farkas, K., Hillary, L.S., Malham, S.K., McDonald, J.E., Jones, D.L., 2020. Wastewater and public health: the  
491 potential of wastewater surveillance for monitoring COVID-19. *Current Opinion in Environmental*  
492 *Science & Health* 17, 14–20. <https://doi.org/10.1016/j.coesh.2020.06.001>
- 493 Fumian, T.M., Fioretti, J.M., Lun, J.H., dos Santos, I.A.L., White, P.A., Miagostovich, M.P., 2019. Detection of  
494 norovirus epidemic genotypes in raw sewage using next generation sequencing. *Environment*  
495 *International* 123, 282–291. <https://doi.org/10.1016/j.envint.2018.11.054>
- 496 Gerrity, D., Papp, K., Stoker, M., Sims, A., Frehner, W., 2021. Early-pandemic wastewater surveillance of SARS-  
497 CoV-2 in Southern Nevada: Methodology, occurrence, and incidence/prevalence considerations. *Water*  
498 *Research X* 10, 100086. <https://doi.org/10.1016/j.wroa.2020.100086>
- 499 Gonzalez, R., Curtis, K., Bivins, A., Bibby, K., Weir, M.H., Yetka, K., Thompson, H., Keeling, D., Mitchell, J.,  
500 Gonzalez, D., 2020. COVID-19 surveillance in Southeastern Virginia using wastewater-based  
501 epidemiology. *Water Research* 186, 116296. <https://doi.org/10.1016/j.watres.2020.116296>
- 502 Haramoto, E., Malla, B., Thakali, O., Kitajima, M., 2020. First environmental surveillance for the presence of  
503 SARS-CoV-2 RNA in wastewater and river water in Japan. *Science of The Total Environment* 737,  
504 140405. <https://doi.org/10.1016/j.scitotenv.2020.140405>
- 505 Hasan, S.W., Ibrahim, Y., Daou, M., Kannout, H., Jan, N., Lopes, A., Alsafar, H., Yousef, A.F., 2021. Detection and  
506 quantification of SARS-CoV-2 RNA in wastewater and treated effluents: Surveillance of COVID-19  
507 epidemic in the United Arab Emirates. *Science of The Total Environment* 764, 142929.  
508 <https://doi.org/10.1016/j.scitotenv.2020.142929>
- 509 Hata, A., Hara-Yamamura, H., Meuchi, Y., Imai, S., Honda, R., 2021. Detection of SARS-CoV-2 in wastewater in  
510 Japan during a COVID-19 outbreak. *Science of The Total Environment* 758, 143578.  
511 <https://doi.org/10.1016/j.scitotenv.2020.143578>
- 512 Hokajärvi, A.-M., Rytönen, A., Tiwari, A., Kauppinen, A., Oikarinen, S., Lehto, K.-M., Kankaanpää, A., Gunnar,  
513 T., Al-Hello, H., Blomqvist, S., Miettinen, I.T., Savolainen-Kopra, C., Pitkänen, T., 2021. The detection  
514 and stability of the SARS-CoV-2 RNA biomarkers in wastewater influent in Helsinki, Finland. *Science of*  
515 *The Total Environment* 770, 145274. <https://doi.org/10.1016/j.scitotenv.2021.145274>
- 516 Istituto Superiore di Sanità (ISS), Epicentro. Sorveglianza integrata COVID-19: i principali dati nazionali.  
517 Available at: <https://www.epicentro.iss.it/coronavirus/sars-cov-2-sorveglianza-dati>. Last Access: 30  
518 April 2021.

- 519 Kitajima, M., Ahmed, W., Bibby, K., Carducci, A., Gerba, C.P., Hamilton, K.A., Haramoto, E., Rose, J.B., 2020.  
520 SARS-CoV-2 in wastewater: State of the knowledge and research needs. *Science of The Total*  
521 *Environment* 739, 139076. <https://doi.org/10.1016/j.scitotenv.2020.139076>
- 522 La Rosa, G., Iaconelli, M., Mancini, P., Bonanno Ferraro, G., Veneri, C., Bonadonna, L., Lucentini, L., Suffredini,  
523 E., 2020. First detection of SARS-CoV-2 in untreated wastewaters in Italy. *Science of The Total*  
524 *Environment* 736, 139652. <https://doi.org/10.1016/j.scitotenv.2020.139652>
- 525 La Rosa, G., Mancini, P., Bonanno Ferraro, G., Veneri, C., Iaconelli, M., Bonadonna, L., Lucentini, L., Suffredini,  
526 E., 2021. SARS-CoV-2 has been circulating in northern Italy since December 2019: Evidence from  
527 environmental monitoring. *Science of The Total Environment* 750, 141711.  
528 <https://doi.org/10.1016/j.scitotenv.2020.141711>
- 529 Lodder, W., de Roda Husman, A.M., 2020. SARS-CoV-2 in wastewater: potential health risk, but also data  
530 source. *The Lancet Gastroenterology & Hepatology* 5, 533–534. <https://doi.org/10.1016/S2468->  
531 [1253\(20\)30087-X](https://doi.org/10.1016/S2468-1253(20)30087-X)
- 532 McCall, C., Wu, H., Miyani, B., Xagorarakis, I., 2020. Identification of multiple potential viral diseases in a large  
533 urban center using wastewater surveillance. *Water Research* 184, 116160.  
534 <https://doi.org/10.1016/j.watres.2020.116160>
- 535 Medema, G., Heijnen, L., Elsinga, G., Italiaander, R., Brouwer, A., 2020. Presence of SARS-Coronavirus-2 RNA in  
536 Sewage and Correlation with Reported COVID-19 Prevalence in the Early Stage of the Epidemic in The  
537 Netherlands. *Environmental Science & Technology Letters* 7, 511–516.  
538 <https://doi.org/10.1021/acs.estlett.0c00357>
- 539 Michael-Kordatou, I., Karaolia, P., Fatta-Kassinos, D., 2020. Sewage analysis as a tool for the COVID-19  
540 pandemic response and management: the urgent need for optimised protocols for SARS-CoV-2  
541 detection and quantification. *Journal of Environmental Chemical Engineering* 8, 104306.  
542 <https://doi.org/10.1016/j.jece.2020.104306>
- 543 Mlejnkova, H., Sovova, K., Vasickova, P., Ocenaskova, V., Jasikova, L., Juranova, E., 2020. Preliminary Study of  
544 Sars-Cov-2 Occurrence in Wastewater in the Czech Republic. *International Journal of Environmental*  
545 *Research and Public Health* 17, 5508. <https://doi.org/10.3390/ijerph17155508>
- 546 Parasa, S., Desai, M., Thoguluva Chandrasekar, V., Patel, H.K., Kennedy, K.F., Roesch, T., Spadaccini, M.,  
547 Colombo, M., Gabbiadini, R., Artifon, E.L.A., Repici, A., Sharma, P., 2020. Prevalence of Gastrointestinal  
548 Symptoms and Fecal Viral Shedding in Patients With Coronavirus Disease 2019: A Systematic Review  
549 and Meta-analysis. *JAMA Network Open* 3, e2011335.  
550 <https://doi.org/10.1001/jamanetworkopen.2020.11335>
- 551 Peccia, J., Zulli, A., Brackney, D.E., Grubaugh, N.D., Kaplan, E.H., Casanovas-Massana, A., Ko, A.I., Malik, A.A.,  
552 Wang, D., Wang, M., Warren, J.L., Weinberger, D.M., Arnold, W., Omer, S.B., 2020. Measurement of  
553 SARS-CoV-2 RNA in wastewater tracks community infection dynamics. *Nature Biotechnology* 38, 1164–  
554 1167. <https://doi.org/10.1038/s41587-020-0684-z>
- 555 Pellegrinelli, L., Bubba, L., Primache, V., Pariani, E., Battistone, A., Delogu, R., Fiore, S., Binda, S., 2017.  
556 Surveillance of poliomyelitis in Northern Italy: Results of acute flaccid paralysis surveillance and  
557 environmental surveillance, 2012–2015. *Human Vaccines & Immunotherapeutics* 13, 332–338.  
558 <https://doi.org/10.1080/21645515.2017.1264726>
- 559 Pellegrinelli, L., Galli, C., Binda, S., Primache, V., Tagliacarne, C., Pizza, F., Mazzini, R., Pariani, E., Romanò, L.,  
560 2019. Molecular Characterization and Phylogenetic Analysis of Enteroviruses and Hepatitis A Viruses in  
561 Sewage Samples, Northern Italy, 2016. *Food and Environmental Virology* 11, 393–399.  
562 <https://doi.org/10.1007/s12560-019-09401-4>
- 563 Randazzo, W., Truchado, P., Cuevas-Ferrando, E., Simón, P., Allende, A., Sánchez, G., 2020. SARS-CoV-2 RNA in  
564 wastewater anticipated COVID-19 occurrence in a low prevalence area. *Water Research* 181, 115942.  
565 <https://doi.org/10.1016/j.watres.2020.115942>
- 566 Regione Lombardia, 2020. DGR N° XI / 3114 del 07/05/2020 "DETERMINAZIONI IN MERITO ALLE ATTIVITÀ DI  
567 SORVEGLIANZA IN FUNZIONE DELL'EPIDEMIA COVID-19".

- 568 Regione Lombardia, Dashboard COVID-19. Available at:  
569 [https://www.regione.lombardia.it/wps/portal/istituzionale/HP/servizi-e-informazioni/cittadini/salute-](https://www.regione.lombardia.it/wps/portal/istituzionale/HP/servizi-e-informazioni/cittadini/salute-e-prevenzione/coronavirus/dashboard-covid19)  
570 [e-prevenzione/coronavirus/dashboard-covid19](https://www.regione.lombardia.it/wps/portal/istituzionale/HP/servizi-e-informazioni/cittadini/salute-e-prevenzione/coronavirus/dashboard-covid19). Last Access 30 March 2021.
- 571 Rimoldi, S.G., Stefani, F., Gigantiello, A., Polesello, S., Comandatore, F., Mileto, D., Maresca, M., Longobardi, C.,  
572 Mancon, A., Romeri, F., Pagani, C., Cappelli, F., Roscioli, C., Moja, L., Gismondo, M.R., Salerno, F., 2020.  
573 Presence and infectivity of SARS-CoV-2 virus in wastewaters and rivers. *Science of The Total*  
574 *Environment* 744, 140911. <https://doi.org/10.1016/j.scitotenv.2020.140911>
- 575 Saguti, F., Magnil, E., Enache, L., Churqui, M.P., Johansson, A., Lumley, D., Davidsson, F., Dotevall, L., Mattsson,  
576 A., Trybala, E., Lagging, M., Lindh, M., Gisslén, M., Brezicka, T., Nyström, K., Norder, H., 2021.  
577 Surveillance of wastewater revealed peaks of SARS-CoV-2 preceding those of hospitalized patients with  
578 COVID-19. *Water Research* 189, 116620. <https://doi.org/10.1016/j.watres.2020.116620>
- 579 Sherchan, S.P., Shahin, S., Ward, L.M., Tandukar, S., Aw, T.G., Schmitz, B., Ahmed, W., Kitajima, M., 2020. First  
580 detection of SARS-CoV-2 RNA in wastewater in North America: A study in Louisiana, USA. *Science of*  
581 *The Total Environment* 743, 140621. <https://doi.org/10.1016/j.scitotenv.2020.140621>
- 582 Sims, N., Kasprzyk-Hordern, B., 2020. Future perspectives of wastewater-based epidemiology: Monitoring  
583 infectious disease spread and resistance to the community level. *Environment International* 139,  
584 105689. <https://doi.org/10.1016/j.envint.2020.105689>
- 585 The Economist, covid-19-italy-herd-immunity-GD. Available at: [https://github.com/TheEconomist/covid-19-](https://github.com/TheEconomist/covid-19-italy-herd-immunity-GD)  
586 [italy-herd-immunity-GD](https://github.com/TheEconomist/covid-19-italy-herd-immunity-GD) Last Access: 30 April 2021
- 587 The Global Sewage Surveillance project consortium, Hendriksen, R.S., Munk, P., Njage, P., van Bunnik, B.,  
588 McNally, L., Lukjancenko, O., Röder, T., Nieuwenhuijse, D., Pedersen, S.K., Kjeldgaard, J., Kaas, R.S.,  
589 Clausen, P.T.L.C., Vogt, J.K., Leekitcharoenphon, P., van de Schans, M.G.M., Zuidema, T., de Roda  
590 Husman, A.M., Rasmussen, S., Petersen, B., Amid, C., Cochrane, G., Sicheritz-Ponten, T., Schmitt, H.,  
591 Alvarez, J.R.M., Aidara-Kane, A., Pamp, S.J., Lund, O., Hald, T., Woolhouse, M., Koopmans, M.P., Vigre,  
592 H., Petersen, T.N., Aarestrup, F.M., 2019. Global monitoring of antimicrobial resistance based on  
593 metagenomics analyses of urban sewage. *Nature Communications* 10. [https://doi.org/10.1038/s41467-](https://doi.org/10.1038/s41467-019-08853-3)  
594 [019-08853-3](https://doi.org/10.1038/s41467-019-08853-3)
- 595 Thompson, J.R., Nancharaiah, Y.V., Gu, X., Lee, W.L., Rajal, V.B., Haines, M.B., Girones, R., Ng, L.C., Alm, E.J.,  
596 Wuertz, S., 2020. Making waves: Wastewater surveillance of SARS-CoV-2 for population-based health  
597 management. *Water Research* 184, 116181. <https://doi.org/10.1016/j.watres.2020.116181>
- 598 Trottier, J., Darques, R., Ait Mouheb, N., Partiot, E., Bakhache, W., Deffieu, M.S., Gaudin, R., 2020. Post-  
599 lockdown detection of SARS-CoV-2 RNA in the wastewater of Montpellier, France. *One Health* 10,  
600 100157. <https://doi.org/10.1016/j.onehlt.2020.100157>
- 601 Wang, D., Hu, B., Hu, C., Zhu, F., Liu, X., Zhang, J., Wang, B., Xiang, H., Cheng, Z., Xiong, Y., Zhao, Y., Li, Y., Wang,  
602 X., Peng, Z., 2020. Clinical Characteristics of 138 Hospitalized Patients With 2019 Novel Coronavirus-  
603 Infected Pneumonia in Wuhan, China. *JAMA* 323, 1061. <https://doi.org/10.1001/jama.2020.1585>
- 604 Westhaus, S., Weber, F.-A., Schiwy, S., Linnemann, V., Brinkmann, M., Widera, M., Greve, C., Janke, A., Hollert,  
605 H., Wintgens, T., Ciesek, S., 2021. Detection of SARS-CoV-2 in raw and treated wastewater in Germany  
606 – Suitability for COVID-19 surveillance and potential transmission risks. *Science of The Total*  
607 *Environment* 751, 141750. <https://doi.org/10.1016/j.scitotenv.2020.141750>
- 608 Wu, F., Zhang, J., Xiao, A., Gu, X., Lee, W.L., Armas, F., Kauffman, K., Hanage, W., Matus, M., Ghaeli, N., Endo,  
609 N., Duvallet, C., Poyet, M., Moniz, K., Washburne, A.D., Erickson, T.B., Chai, P.R., Thompson, J., Alm,  
610 E.J., 2020. SARS-CoV-2 Titers in Wastewater Are Higher than Expected from Clinically Confirmed Cases.  
611 *mSystems* 5. <https://doi.org/10.1128/mSystems.00614-20>
- 612 Wu, Y., Guo, C., Tang, L., Hong, Z., Zhou, J., Dong, X., Yin, H., Xiao, Q., Tang, Y., Qu, X., Kuang, L., Fang, X.,  
613 Mishra, N., Lu, J., Shan, H., Jiang, G., Huang, X., 2020. Prolonged presence of SARS-CoV-2 viral RNA in  
614 faecal samples. *The Lancet Gastroenterology & Hepatology* 5, 434–435.  
615 [https://doi.org/10.1016/S2468-1253\(20\)30083-2](https://doi.org/10.1016/S2468-1253(20)30083-2)

616

617



618

619 **Table 1.** Extraction efficiency of SARS-CoV-2 from spiked wastewater samples and repeatability for  
620 triplicate analysis of a real sample.

|                                     | Viral Target N1 (Ct) |       |       |                       |
|-------------------------------------|----------------------|-------|-------|-----------------------|
|                                     | <i>Replicates</i>    |       |       | <i>Mean and RSD %</i> |
| <i>Spiked wastewater sample</i>     | 19.99                | 20.14 | 20.07 | 20.1 (0.4)            |
| <i>Not spiked wastewater sample</i> | 33.06                | 32.81 | 33.48 | 33.1 (1)              |

621

622

623

624 **Table 2.** SARS-CoV-2 in wastewater in north-western Lombardy (Bergamo and Brescia provinces). Viral targets were two different  
 625 portions of the nucleocapsid (N) gene, N1 and N3 (copies/L).

| Bergamo WWTP   |             |             | Brembate WWTP  |             |             | Ranica WWTP    |             |             | Brescia WWTP   |             |             |
|----------------|-------------|-------------|----------------|-------------|-------------|----------------|-------------|-------------|----------------|-------------|-------------|
| Sampling dates | N1 copies/L | N3 copies/L | Sampling dates | N1 copies/L | N3 copies/L | Sampling dates | N1 copies/L | N3 copies/L | Sampling dates | N1 copies/L | N3 copies/L |
| 30/03/2020     | 1,02E+04    | 1,03E+04    | 30/03/2020     | 2,10E+05    | 1,22E+05    | 01/04/2020     | 2,28E+04    | 1,56E+04    | 30/03/2020     | 6,28E+04    | 3,98E+04    |
| 05/04/2020     | 7,29E+03    | 4,95E+03    | 06/04/2020     | 9,73E+04    | 7,93E+04    | 05/04/2020     | 2,58E+04    | 1,69E+04    | 06/04/2020     | 2,22E+04    | 1,36E+04    |
| 13/04/2020     | 4,61E+03    | 4,04E+03    | 14/04/2020     | 1,97E+04    | 2,12E+04    | 08/04/2020     | 6,24E+03    | 1,38E+04    | 13/04/2020     | 7,03E+03    | 8,24E+03    |
| 21/04/2020     | 2,06E+03    | 1,86E+03    | 22/04/2020     | 1,67E+04    | 1,76E+04    | 15/04/2020     | 5,00E+03    | 1,95E+04    | 21/04/2020     | 3,81E+03    | 5,57E+03    |
| 29/04/2020     | 1,42E+03    | nd          | 29/04/2020     | 1,50E+03    | 1,99E+03    | 19/04/2020     | 8,91E+03    | 8,61E+03    | 28/04/2020     | 2,53E+03    | 4,51E+02    |
| 04/05/2020     | 1,06E+03    | 2,65E+03    | 06/05/2020     | 3,37E+03    | 3,59E+03    | 26/04/2020     | 3,24E+03    | 4,03E+03    | 12/05/2020     | nd          | nd          |
| 12/05/2020     | 1,15E+03    | nd          | 13/05/2020     | nd          | 4,55E+03    | 03/05/2020     | 9,45E+03    | 1,10E+04    | 19/05/2020     | 2,72E+03    | nd          |
| 19/05/2020     | nd          | nd          | 20/05/2020     | 1,51E+03    | 2,31E+03    | 10/05/2020     | nd          | nd          | 26/05/2020     | nd          | nd          |
| 27/05/2020     | nd          | nd          | 27/05/2020     | 3,82E+03    | 5,51E+03    | 17/05/2020     | 3,57E+03    | 4,11E+03    | 16/06/2020     | nd          | 2,70E+03    |
| 10/06/2020     | nd          | nd          | 03/06/2020     | 1,39E+03    | 4,63E+03    | 24/05/2020     | nd          | nd          |                |             |             |
| 16/06/2020     | nd          | nd          | 10/06/2020     | nd          | nd          | 07/06/2020     | nd          | nd          |                |             |             |
|                |             |             | 17/06/2020     | nd          | nd          | 14/06/2020     | nd          | 3,84E+03    |                |             |             |

626

627

628

629

630

631

632

633 **Table 3.** SARS-CoV-2 in wastewater in the south of Lombardy (Cremona and Lodi provinces). Viral targets were two different portions of  
 634 the nucleocapsid (N) gene, N1 and N3 (copies/L).

| Cremona WWTP          |                    |                    | Crema WWTP            |                    |                    | Lodi WWTP             |                    |                    |
|-----------------------|--------------------|--------------------|-----------------------|--------------------|--------------------|-----------------------|--------------------|--------------------|
| <i>Sampling dates</i> | <i>N1 copies/L</i> | <i>N3 copies/L</i> | <i>Sampling dates</i> | <i>N1 copies/L</i> | <i>N3 copies/L</i> | <i>Sampling dates</i> | <i>N1 copies/L</i> | <i>N3 copies/L</i> |
| 31/03/2020            | 8,16E+03           | 9,15E+03           | 31/03/2020            | 6,96,E+03          | 6,85,E+03          | 30/03/2020            | 7,64E+04           | 8,29E+04           |
| 05/04/2020            | 9,19E+03           | 5,48E+03           | 07/04/2020            | 1,47,E+04          | 1,27,E+04          | 01/04/2020            | 9,29E+03           | 1,01E+04           |
| 10/04/2020            | 1,02E+04           | 3,20E+03           | 14/04/2020            | 9,91,E+03          | 3,21,E+03          | 05/04/2020            | 8,24E+03           | 1,26E+04           |
| 16/04/2020            | 2,39E+03           | 1,90E+03           | 21/04/2020            | 1,21,E+03          | 5,30,E+03          | 13/04/2020            | 1,62E+04           | 1,93E+04           |
| 23/04/2020            | 2,00E+03           | 3,61E+03           | 28/04/2020            | 2,78,E+03          | 6,25,E+03          | 21/04/2020            | 8,44E+03           | 1,14E+04           |
| 28/04/2020            | 2,02E+03           | 1,52E+03           | 05/05/2020            | 2,54,E+03          | nd                 | 28/04/2020            | 1,53E+04           | 1,22E+04           |
| 05/05/2020            | nd                 | nd                 | 12/05/2020            | nd                 | nd                 | 05/05/2020            | nd                 | nd                 |
| 12/05/2020            | nd                 | nd                 | 20/05/2020            | nd                 | nd                 | 12/05/2020            | 2,30E+03           | 2,74E+03           |
| 20/05/2020            | 2,31E+03           | nd                 | 26/05/2020            | nd                 | nd                 | 19/05/2020            | 2,34E+03           | 2,70E+03           |
| 26/05/2020            | nd                 | nd                 | 02/06/2020            | nd                 | nd                 | 26/05/2020            | nd                 | nd                 |
| 02/06/2020            | nd                 | nd                 | 09/06/2020            | nd                 | 2,41,E+03          | 02/06/2020            | nd                 | nd                 |
| 10/06/2020            | nd                 | nd                 | 16/06/2020            | nd                 | nd                 | 09/06/2020            | nd                 | nd                 |
|                       |                    |                    |                       |                    |                    | 16/06/2020            | nd                 | nd                 |

635

636

637

638

639 **Table 4.** SARS-CoV-2 in wastewater in the municipality of Milan. Viral targets were two different  
 640 portions of the nucleocapsid (N) gene, N1 and N3 (copies/L).

641

| Milano WWTP 1         |                    |                    | Milano WWTP 2         |                    |                    |
|-----------------------|--------------------|--------------------|-----------------------|--------------------|--------------------|
| <i>Sampling dates</i> | <i>N1 copies/L</i> | <i>N3 copies/L</i> | <i>Sampling dates</i> | <i>N1 copies/L</i> | <i>N3 copies/L</i> |
| 03/03/2020            | 5,23E+03           | 2,58E+03           |                       |                    |                    |
| 26/03/2020            | 1,47E+04           | 3,24E+04           |                       |                    |                    |
| 31/03/2020            | 1,39E+04           | 1,43E+04           | 31/03/2020            | 9,19E+03           | 2,31E+03           |
| 07/04/2020            | 7,34E+03           | 4,93E+03           | 07/04/2020            | 2,10E+03           | 2,04E+03           |
| 14/04/2020            | 1,92E+03           | 6,29E+03           | 14/04/2020            | 4,72E+03           | 3,10E+03           |
| 21/04/2020            | 1,73E+03           | 2,55E+03           | 21/04/2020            | nd                 | 1,42E+03           |
| 28/04/2020            | 2,81E+03           | 2,44E+03           | 28/04/2020            | 1,30E+03           | nd                 |
| 06/05/2020            | 3,25E+03           | nd                 | 05/05/2020            | nd                 | nd                 |
| 12/05/2020            | nd                 | 1,68E+03           | 12/05/2020            | nd                 | nd                 |
| 19/05/2020            | nd                 | nd                 | 19/05/2020            | 1,32E+03           | 2,89E+03           |
| 26/05/2020            | 4,69E+03           | 2,32E+03           | 26/05/2020            | nd                 | nd                 |
| 31/05/2020            | nd                 | nd                 | 02/06/2020            | nd                 | nd                 |
| 09/06/2020            | nd                 | nd                 | 09/06/2020            | nd                 | nd                 |
| 14/06/2020            | nd                 | nd                 | 16/06/2020            | nd                 | nd                 |

642

643

644

645

646 **Table 5.** Viral loads (RNA copies/day/1,000 people) of SARS-CoV-2 in the cities investigated in March-June 2020.

| <i>Viral load (RNA copies/day/1000 people)</i> |                |                 |               |                |                |              |             |                |                |
|------------------------------------------------|----------------|-----------------|---------------|----------------|----------------|--------------|-------------|----------------|----------------|
| <i>Dates</i>                                   | <i>Bergamo</i> | <i>Brembate</i> | <i>Ranica</i> | <i>Brescia</i> | <i>Cremona</i> | <i>Crema</i> | <i>Lodi</i> | <i>Milan 1</i> | <i>Milan 2</i> |
| March 30-31                                    | 3,40E+09       | 9,28E+10        | 1,25E+10      | 1,24E+10       | 1,95E+09       | 2,23E+09     | 1,97E+10    | 2,26E+09       | 3,21E+09       |
| April 1-15                                     | 2,10E+09       | 2,43E+10        | 8,79E+09      | 3,08E+09       | 2,60E+09       | 4,03E+09     | 2,74E+09    | 8,23E+08       | 1,21E+09       |
| April 16-30                                    | 7,46E+08       | 4,25E+09        | 3,60E+09      | 6,40E+08       | 6,35E+08       | 6,90E+08     | 3,95E+09    | 6,01E+08       | 7,25E+08       |
| May 1-15                                       | 4,42E+08       | 2,01E+09        | 3,64E+09      | 0,00E+00       | 0,00E+00       | 4,88E+08     | 4,44E+08    | 4,89E+08       | 0,00E+00       |
| May 16-30                                      | 0,00E+00       | 1,37E+09        | 2,17E+09      | 3,03E+08       | 4,96E+08       | 0,00E+00     | 3,79E+08    | 3,56E+08       | 3,07E+08       |
| June 1-15                                      | 0,00E+00       | 3,80E+08        | 1,99E+09      | 5,66E+08       | 0,00E+00       | 6,90E+08     | 0,00E+00    | 0,00E+00       | 0,00E+00       |

647

648

649

650 **Figures Captions**

651 **Figure 1.** Cities and wastewater treatment plants (WWTPs) investigated in Lombardy, Italy.

652 **Figure 2.** Correlations of SARS-CoV-2 RNA viral loads in wastewater samples and active cases in  
653 northwestern Lombardy (Bergamo and Brescia provinces).

654 **Figure 3.** Correlations of SARS-CoV-2 RNA viral loads in wastewater samples and active cases in south  
655 Lombardy (Lodi, Crema and Cremona) and in Milan.

656

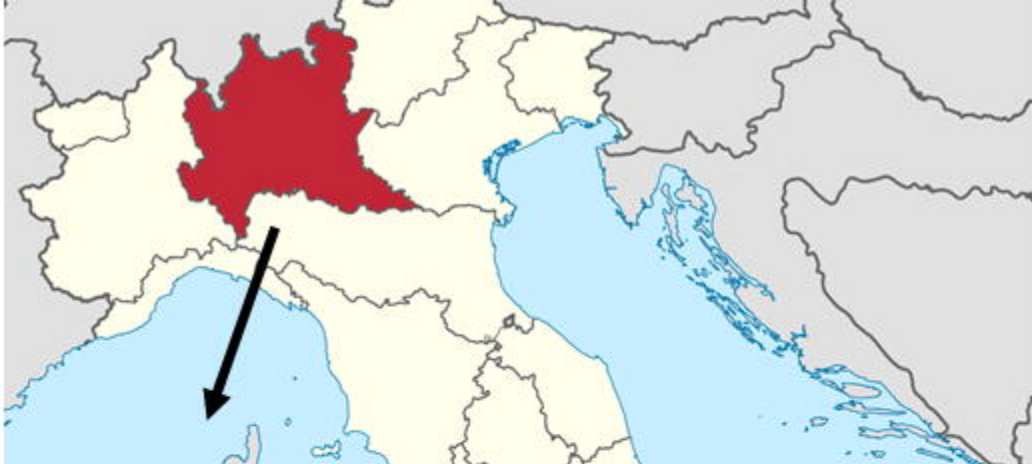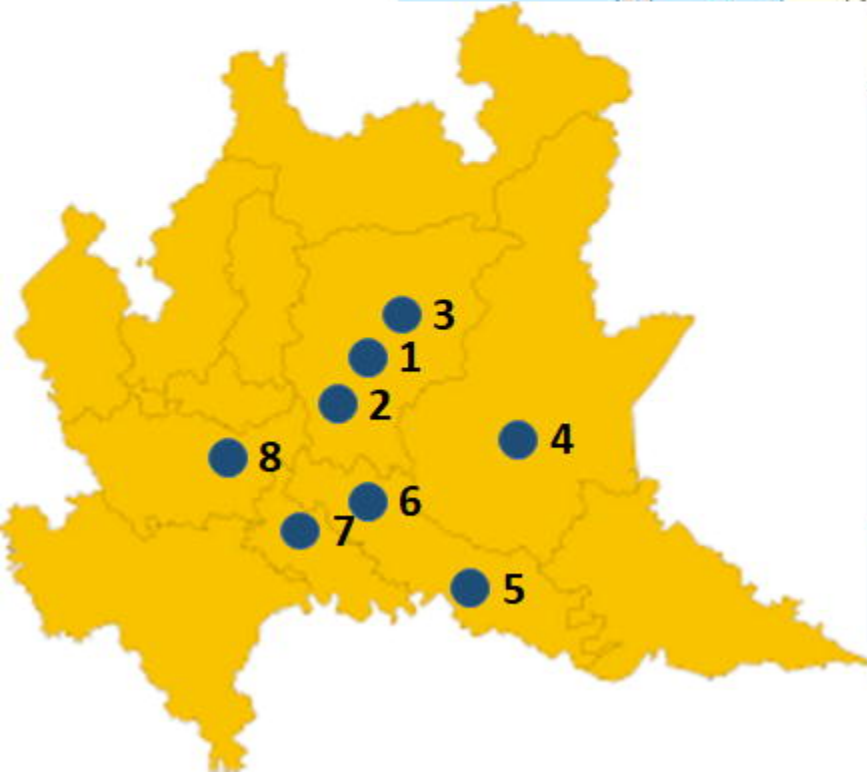

**WWTPs** (*population served*)

1. Bergamo (115,822)
2. Brembate (114,070)
3. Ranica (63,865)
4. Brescia (278,495)
5. Cremona (101,036)
6. Crema (94,545)
7. Lodi (46,000)
8. Milan (1,461,950)

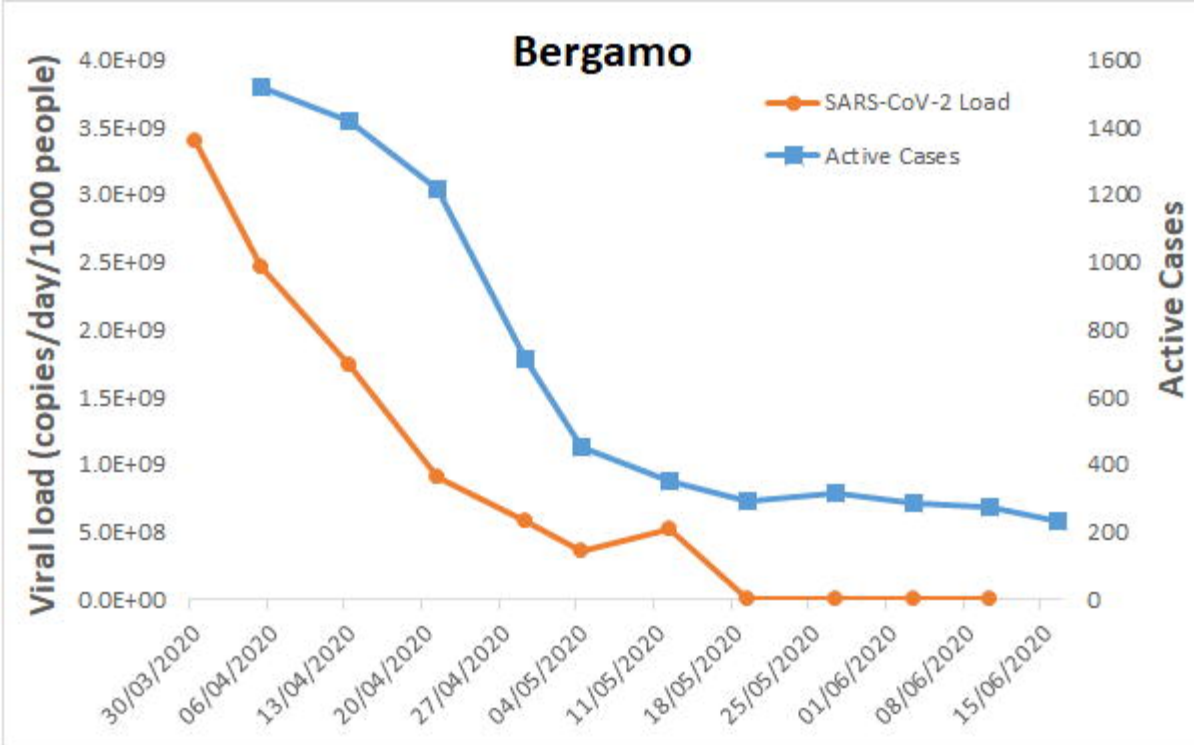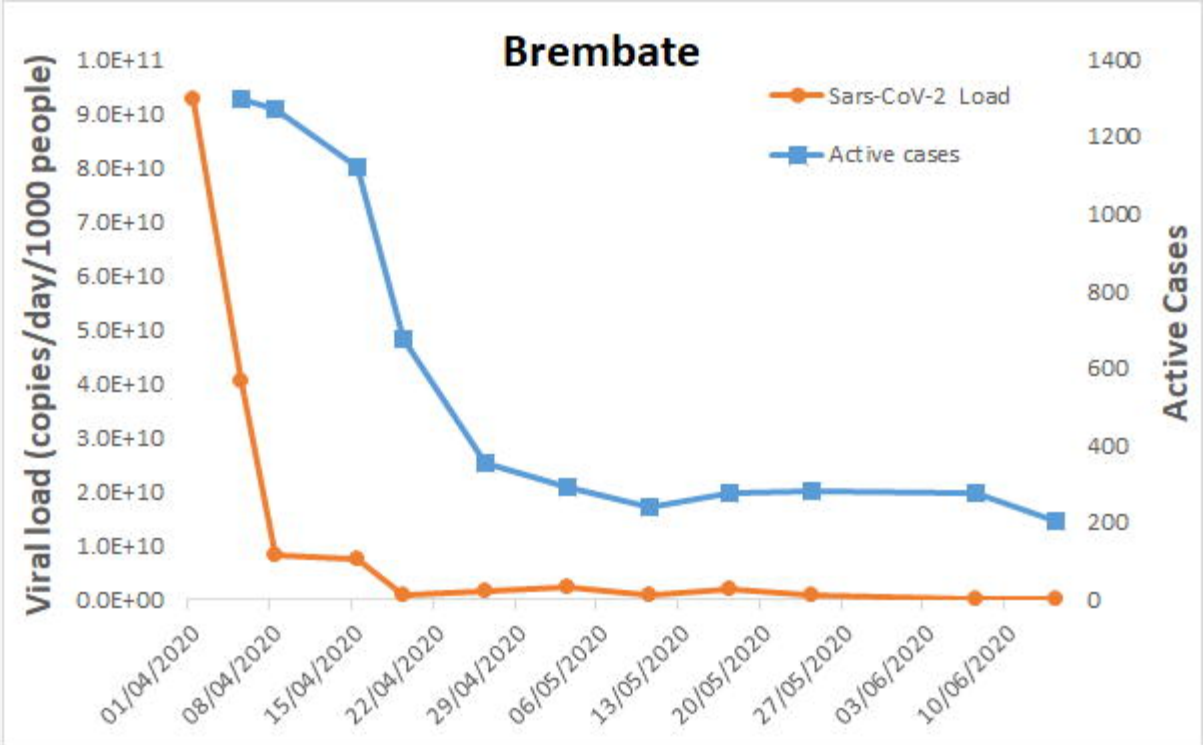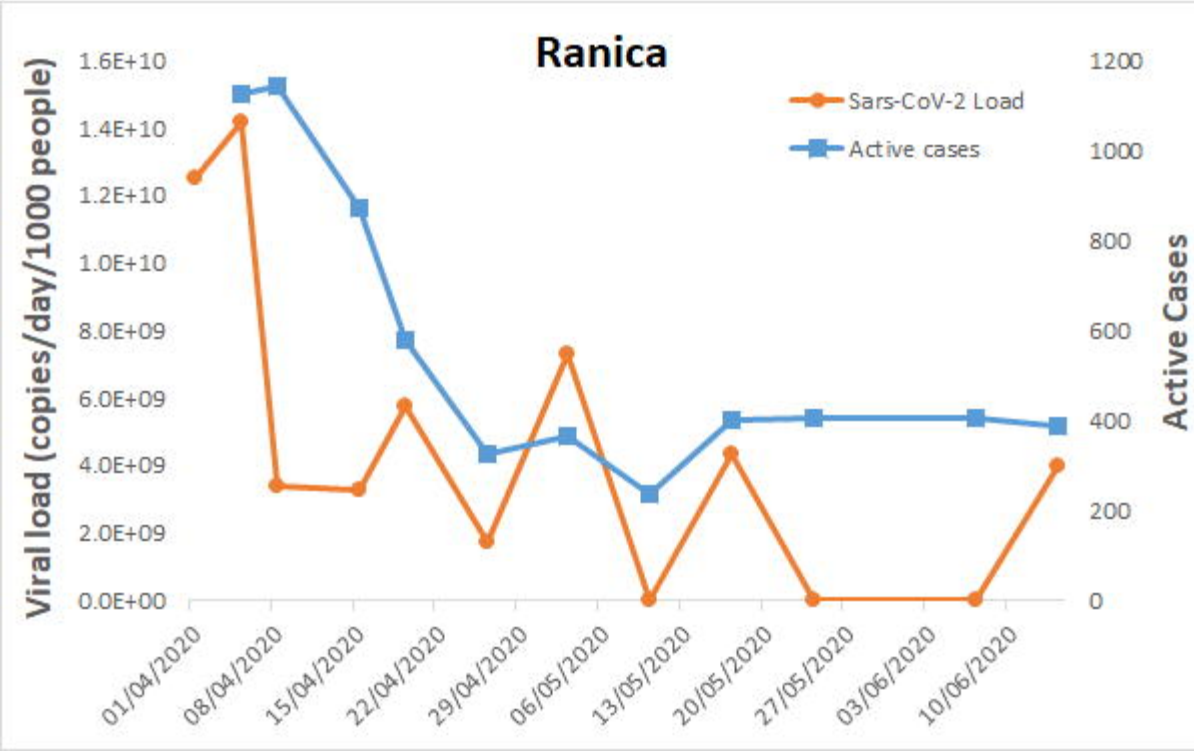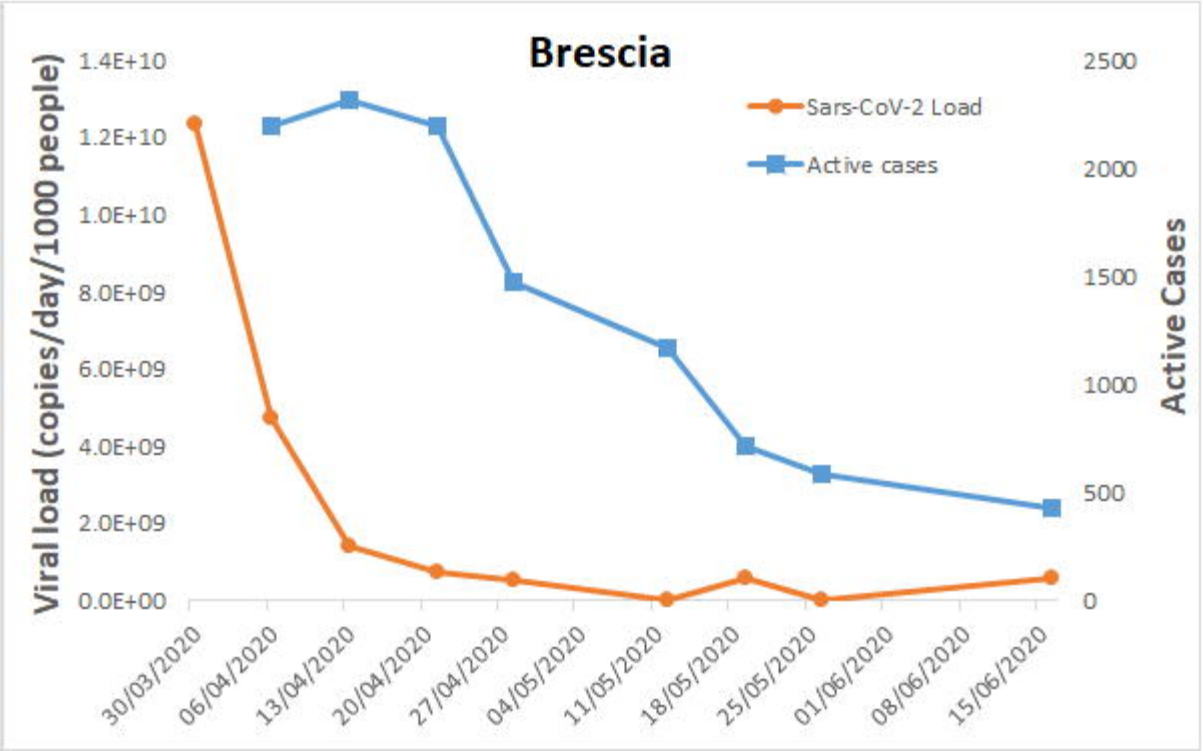



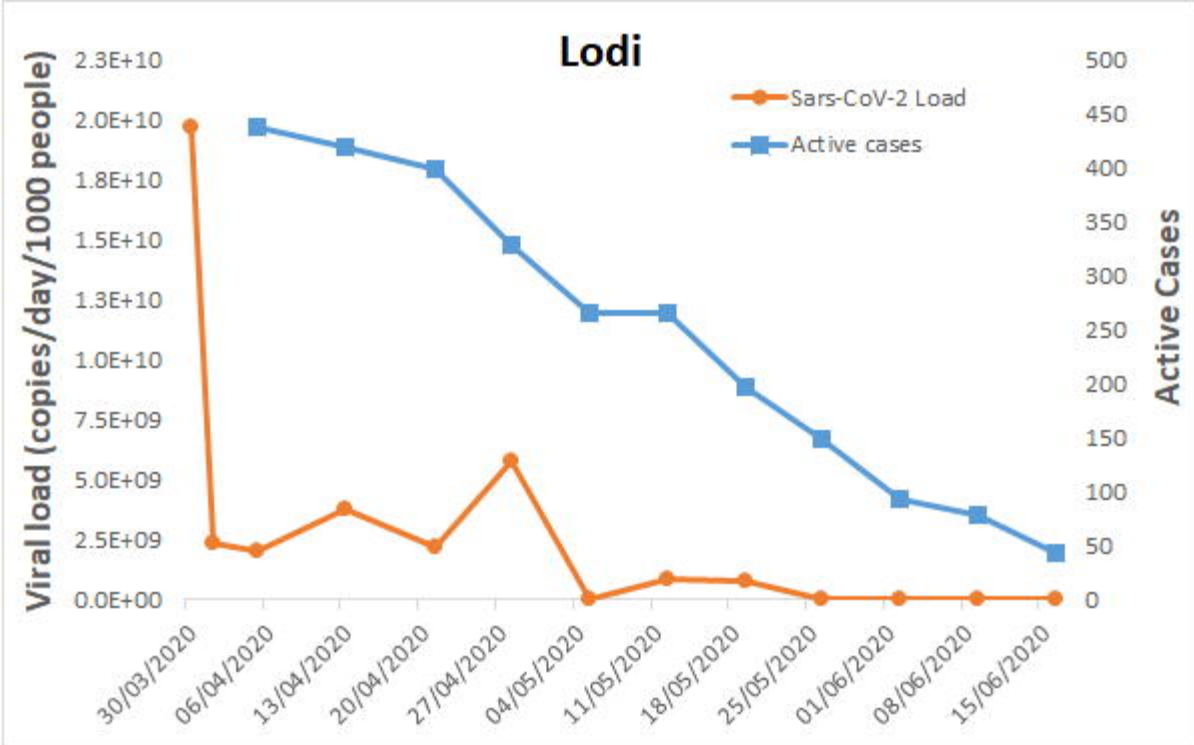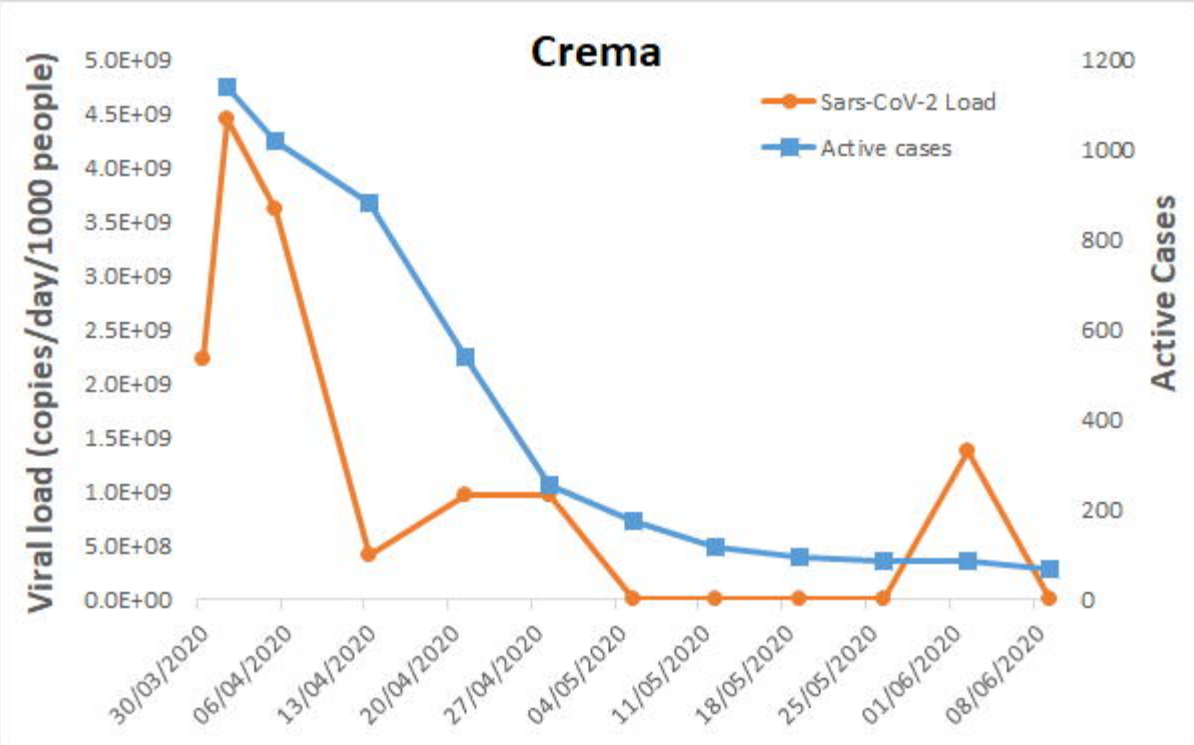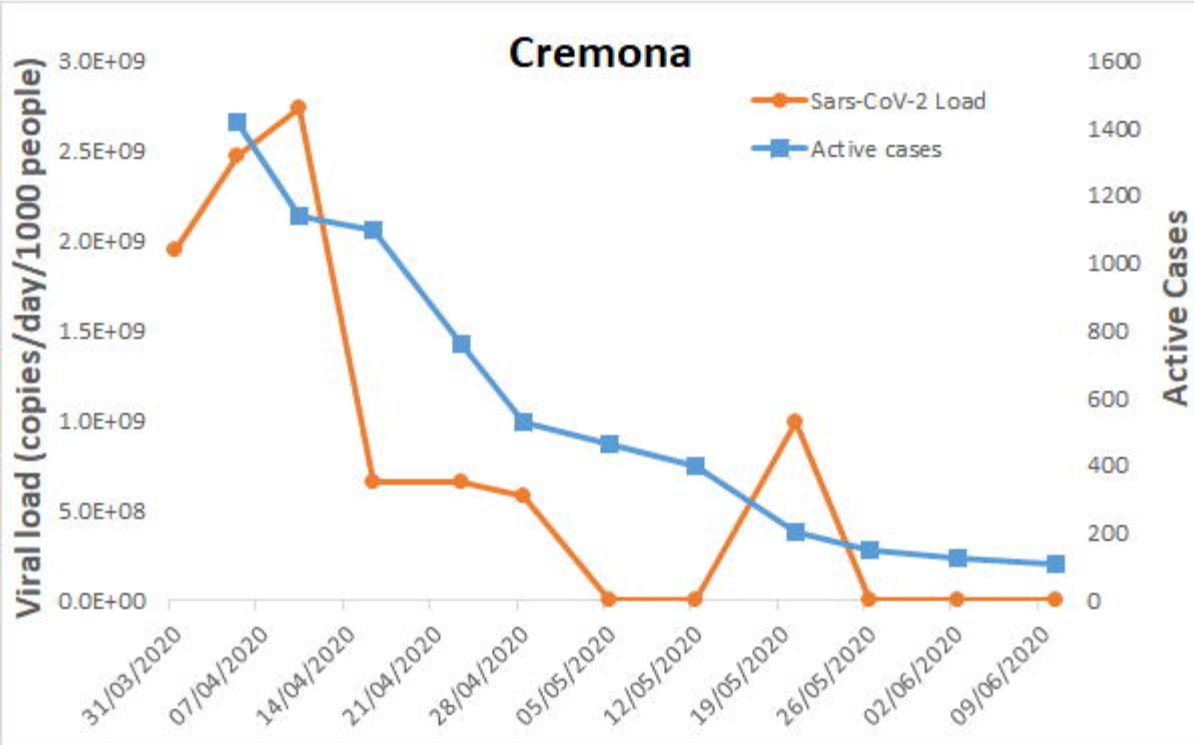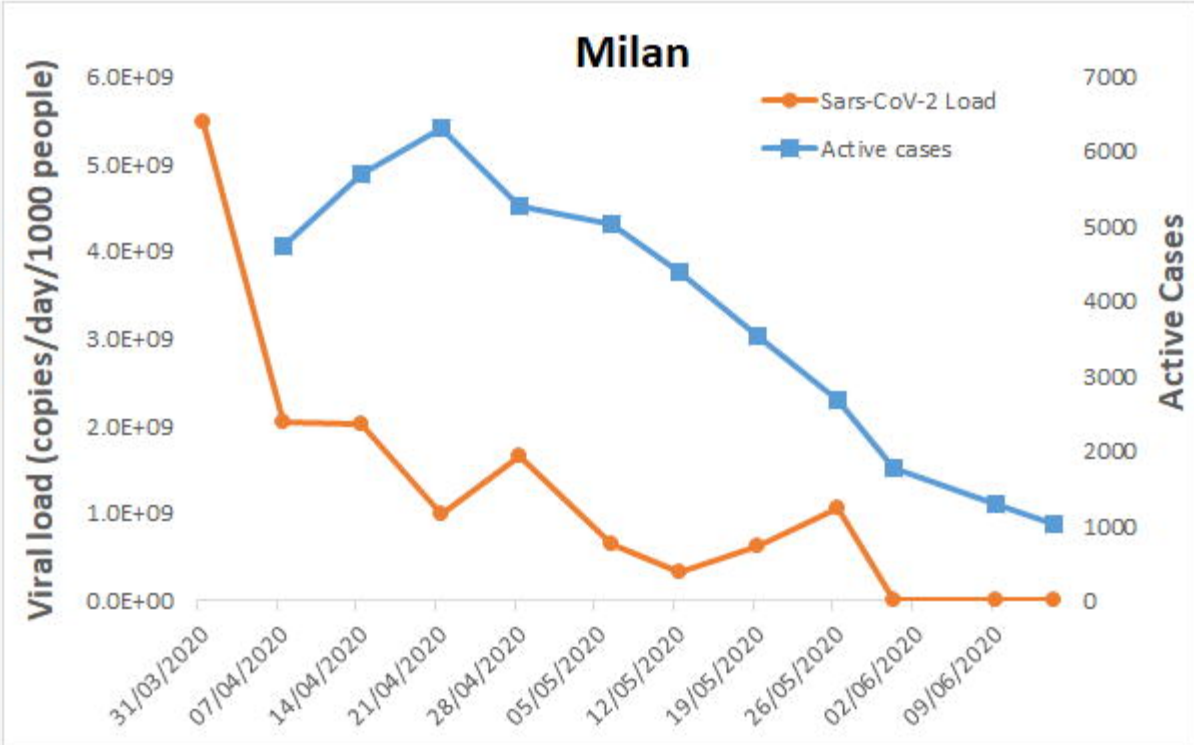

Source: https://medrxiv.org/content/medrxiv/early/2021/05/09/2021.05.05.21256677.full.pdf
